# Supplementary material
Source: ML conference proceedings conference paper supplement (https://proceedings.neurips.cc/paper_files/paper/2022/hash/2cd5737c59645f7ef23b2842b705edf2-Abstract.html)
Supplement: Supplementary file 2 [file 2cd5737c59645f7ef23b2842b705edf2-Supplemental-Conference.pdf]

## 575 Supplementary Materials

### 576 A ViT-3B model details

577 The ViT model we use in this work is based on a standard Vision Transformer [7] model scaled to  
578 nearly 3 billion parameters, using a patch size of 14, 16 heads, 64 blocks, an MLP dimension of 8192  
579 and a hidden dimension of 2048. The model is defined and trained in Lingvo [32]; we additionally  
580 employ GSPMD [41] for training. The model is pre-trained on JFT-3B [35] using training settings  
581 that optimize for performance on JFT-3B rather than for fine-tuning on ImageNet; notably, we do not  
582 use the training recipe that helps few-shot transfer performance [44]. For fine-tuning on ImageNet,  
583 we use the AdamW optimizer (beta1=0.9, beta2=0.999, epsilon=1e-8, weight\_decay=0.3) with a  
584 cosine learning rate schedule (max learning rate of 3e-2, warmup of 2k steps, final rate of 3e-4), a  
585 training batch size of 512, and fine-tune for a total of 10 epochs.

### 586 B Review tools

587 We include screenshots of the reviewing tools we built to analyze model mistakes. Figure 3 shows  
588 the UI for reviewing model predictions and Figure 4 shows the UI that displays the labeling guide  
and slide bar to browse images for a particular class.

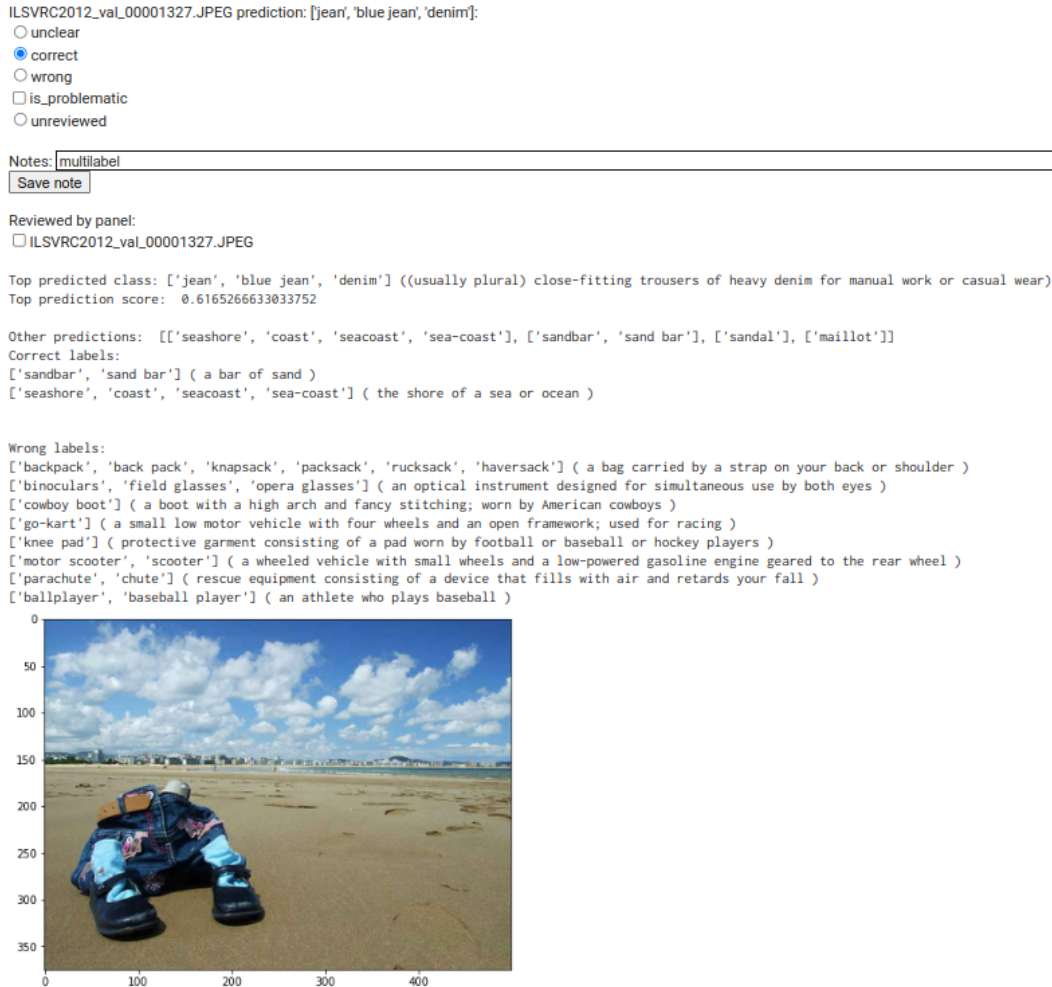

Figure 3: A screenshot of the UI we built to review model predictions. For each image, we determined whether the prediction was correct, wrong, or unclear. We also flagged images as problematic if the ground truth label for the image was incorrect.

## bakery, bakeshop, bakehouse

- The image does not have to show the building.
- Many **bakery** images have many baked goods, e.g., an entire tray of cupcakes.
- Cakes appear individually more often in this class. There is also no other class for cake, so we count cakes as **bakery**.
- More generally, if the image shows an individual baked item and there is no other suitable baked good class for it, the image counts as **bakery**.

### Display images

show\_n: 50

dataset: INetVal

[Show code](#)

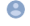

a workplace where baked goods (breads and cakes and pastries) are produced or sold - Key: 2136211865742104015-n02776631-ILSVRC2012\_val\_00010307.JPEG, is\_problematic: NO

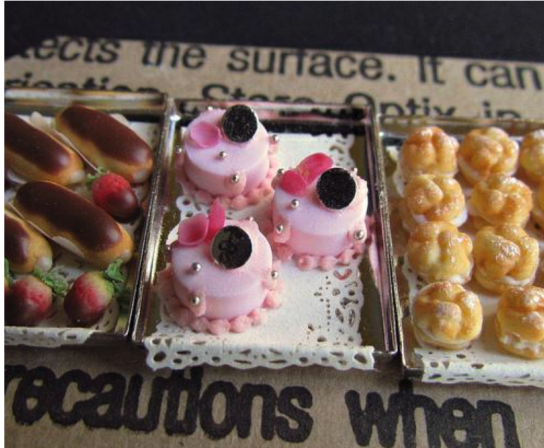

Figure 4: A screenshot of the class search tool we built that displays the labeling guide and a slider bar that allows users to browse validation images for a particular class.

## 589 **C Collapsed mappings**

590 We provide our collapsed class mappings that we employed unilaterally, based on determining that  
591 the classes exhibited significant overlap based on the validation set images, or there was a strict  
592 superset relationship between two or more classes. For example, a prediction of ‘eskimo dog’ for a  
593 ‘siberian husky’ label would be considered correct, whereas a prediction of ‘siberian husky’ for an  
594 ‘eskimo dog’ label might not.

595 All siberian huskies and malamutes are also eskimo dogs. 250: 248, 249: 248

596 Sunglass and sunglasses are the same class (bidirectional). 836: 837, 837: 836

597 Indian and African elephants are also tuskers. 385: 101, 386: 101

598 A coffee mug is also a cup. 504: 968

599 Maillot and maillot, tanksuit are the same class (bidirectional). 638: 639, 639: 638

600 Missile and projectile missile are the same class (bidirectional). 657: 744, 744: 657

601 Notebook computer and laptop are the same class (bidirectional). 620: 681, 681: 620

602 Monitor and screen are the same class (bidirectional). 664: 782, 782: 664

603 A cassette player is also a tape player. 482: 848

604 Weasel, polecats, black-footed ferrets, and minks are all the same class. 356: [357, 358, 359], 357:  
605 [356, 358, 359], 358: [356, 357, 359], 359: [356, 357, 358],

606 All bathtubs are tubs, but not all tubs are bathtubs. 435: 876

607 **D Mistake Examples by Severity**

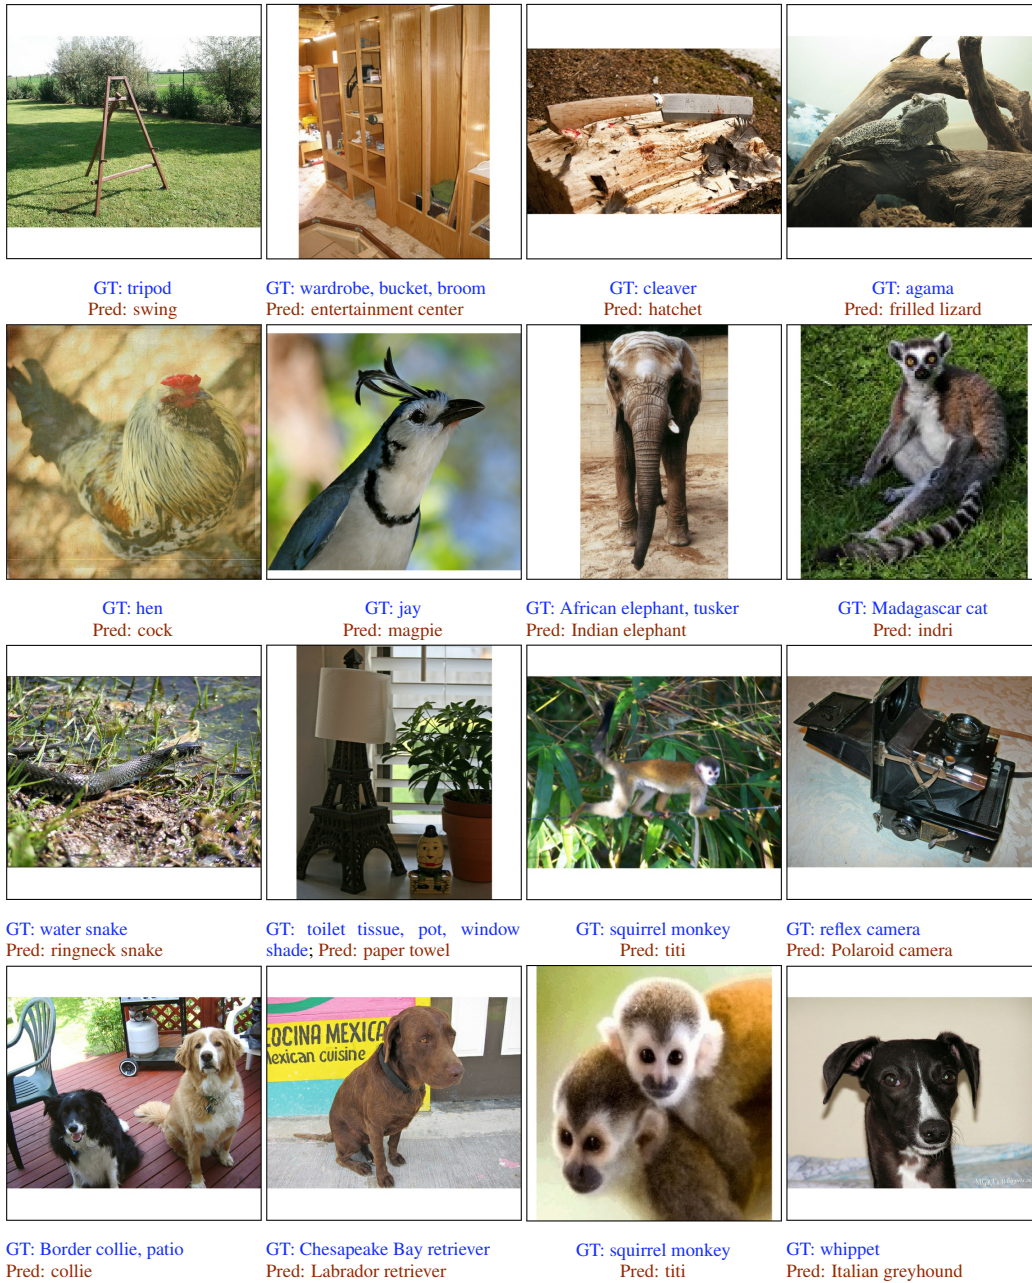

Figure 5: **Major mistakes.** Additional examples of major mistakes. Of the correct multi-labels, the original ImageNet label is listed first.

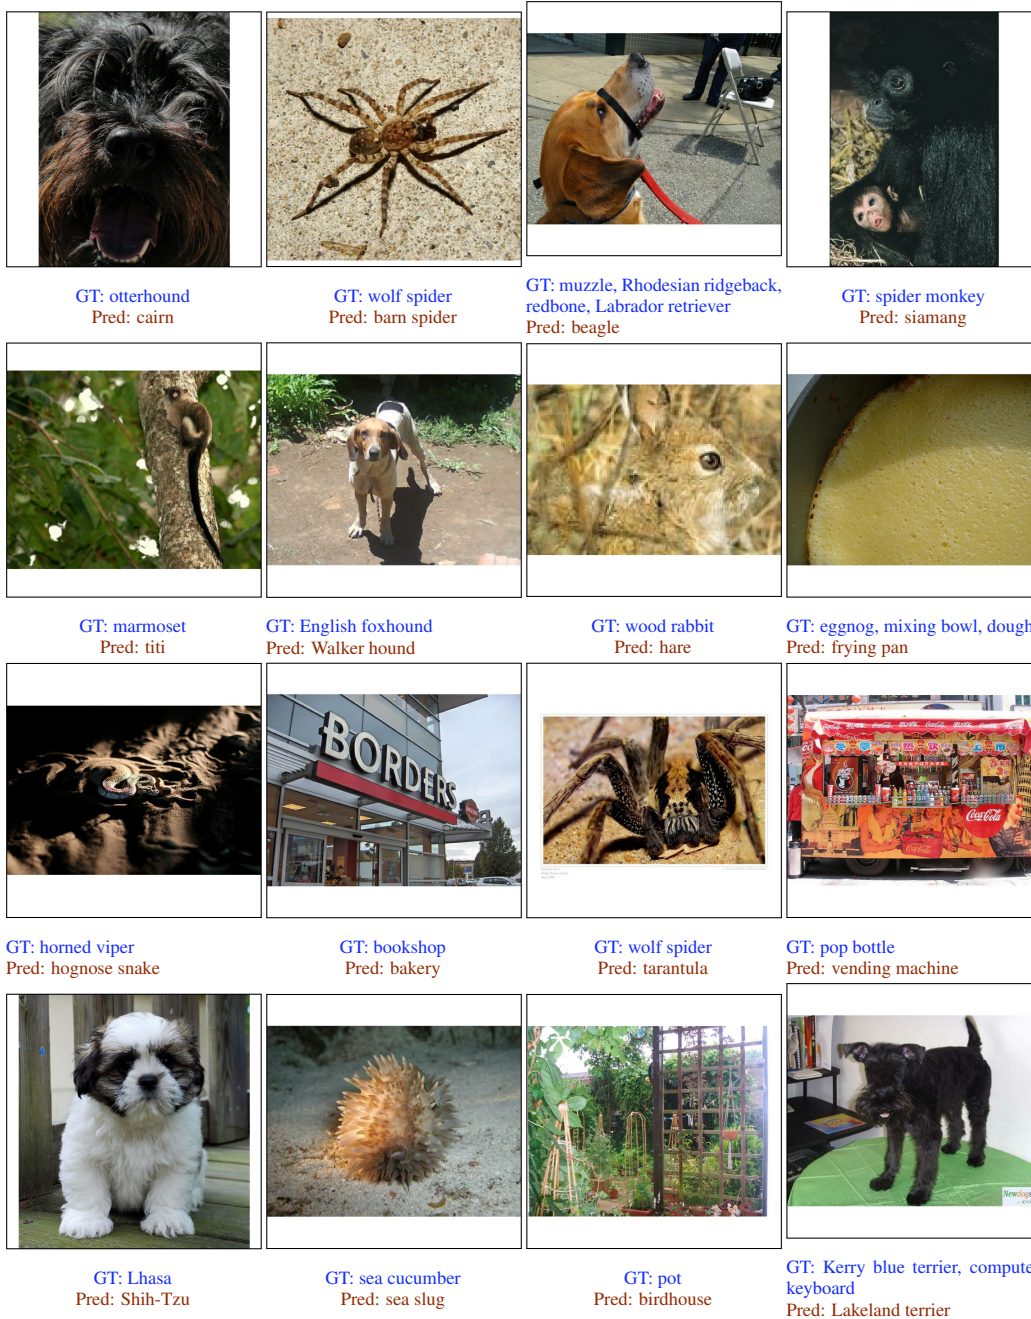

Figure 6: **Minor mistakes.** Additional examples of minor mistakes. Of the correct multi-labels, the original ImageNet label is listed first.

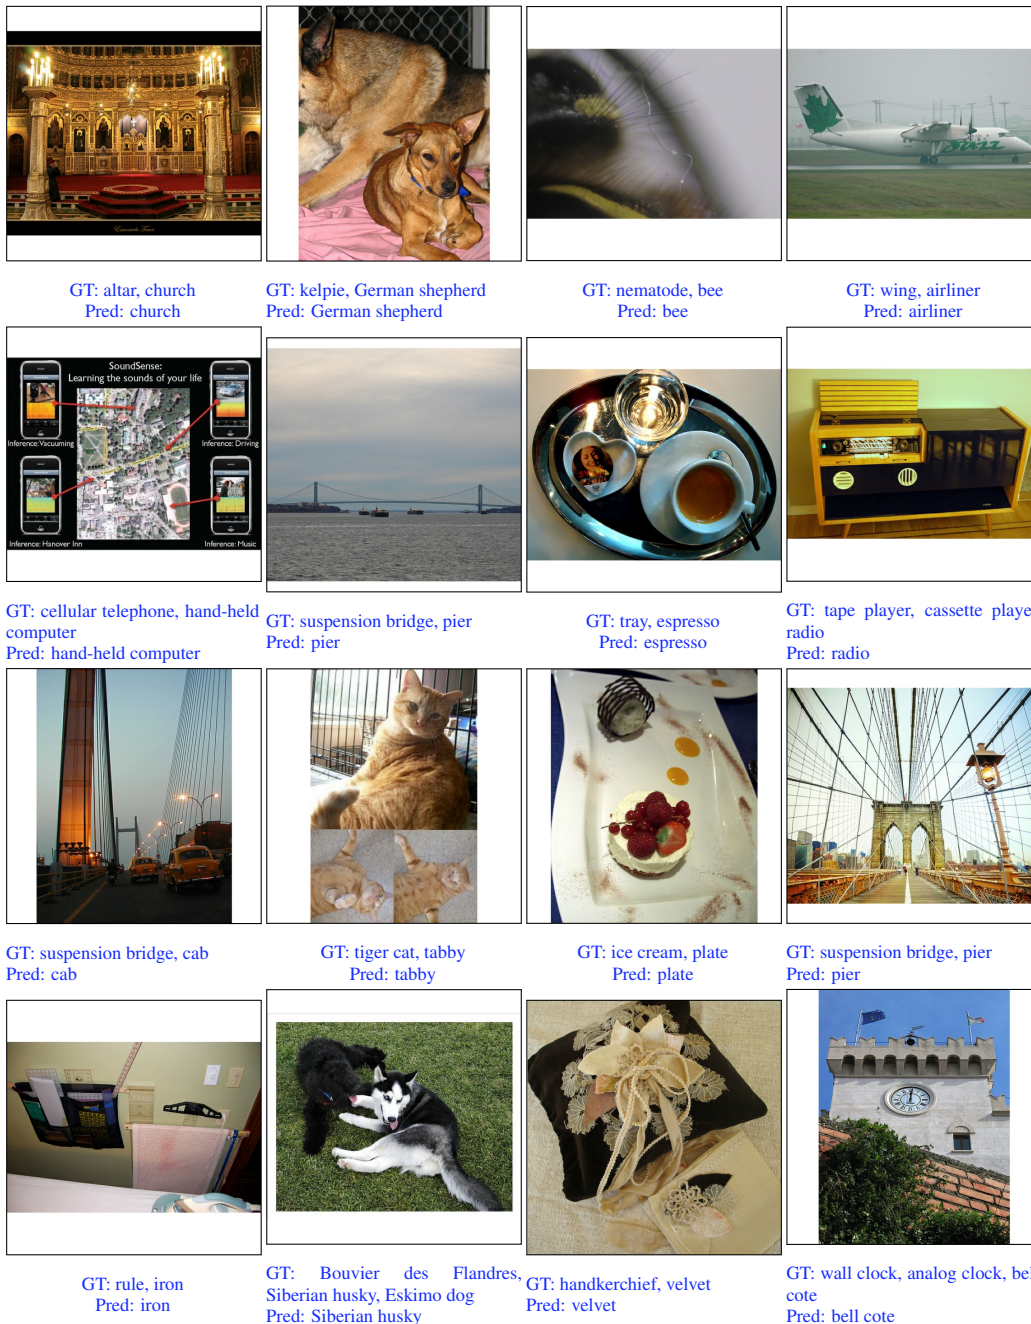

Figure 7: **Correct “mistakes”**. Additional examples where the model makes a correct prediction that we add to the original multi-label annotations. Of the original multi-labels shown, the original ImageNet label is listed first. Often the model correctly identifies a different object in the image, and in some cases a single object has ambiguous class membership and could plausibly belong to either the ground truth or the predicted class.

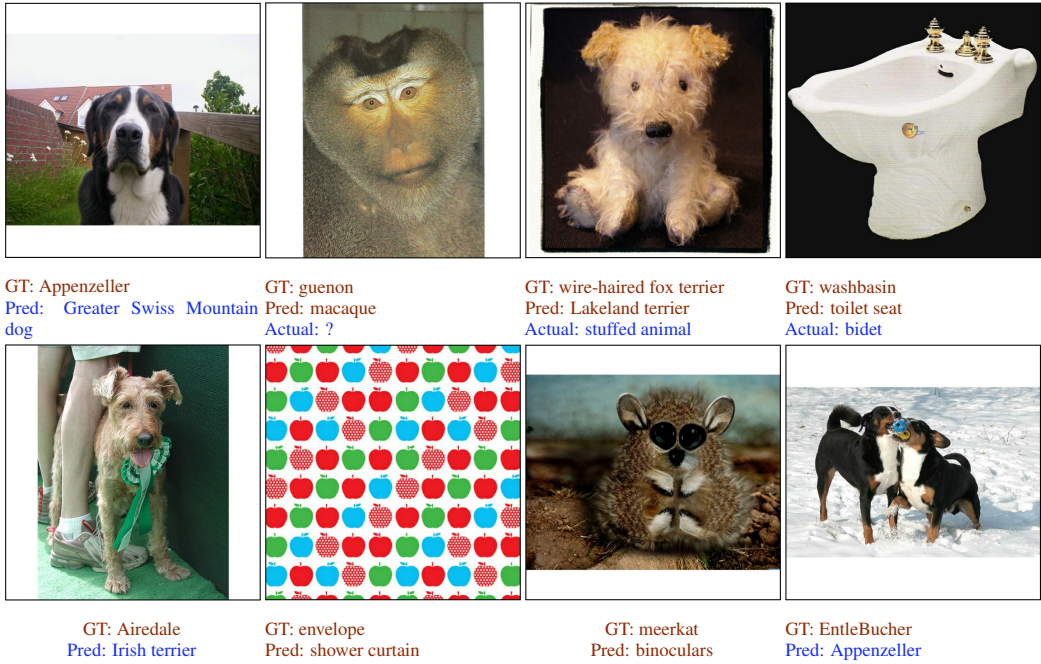

Figure 8: **Problematic “mistakes”**. Examples where our panel determined that the image or its original label was problematic (and therefore should not be in the validation set). Most problematic examples are problematic because the original ImageNet label was deemed incorrect because the prediction by the model was indeed correct.

608 **E Mistake Examples by Category**

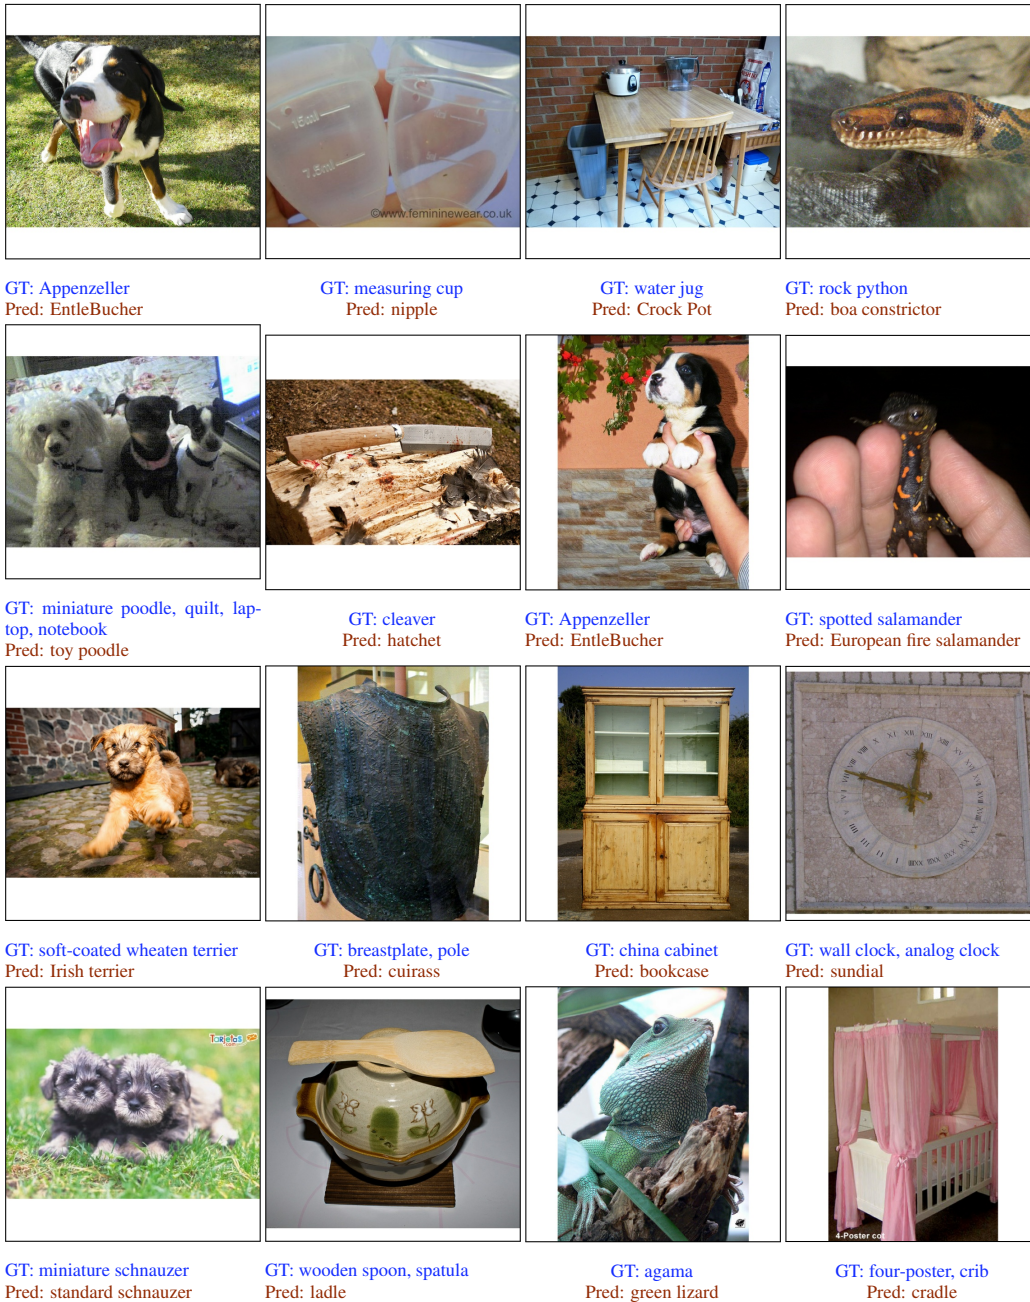

Figure 9: **Fine-grained mistakes.** Additional examples of fine-grained mistakes. Of the correct multi-labels, the original ImageNet label is listed first.



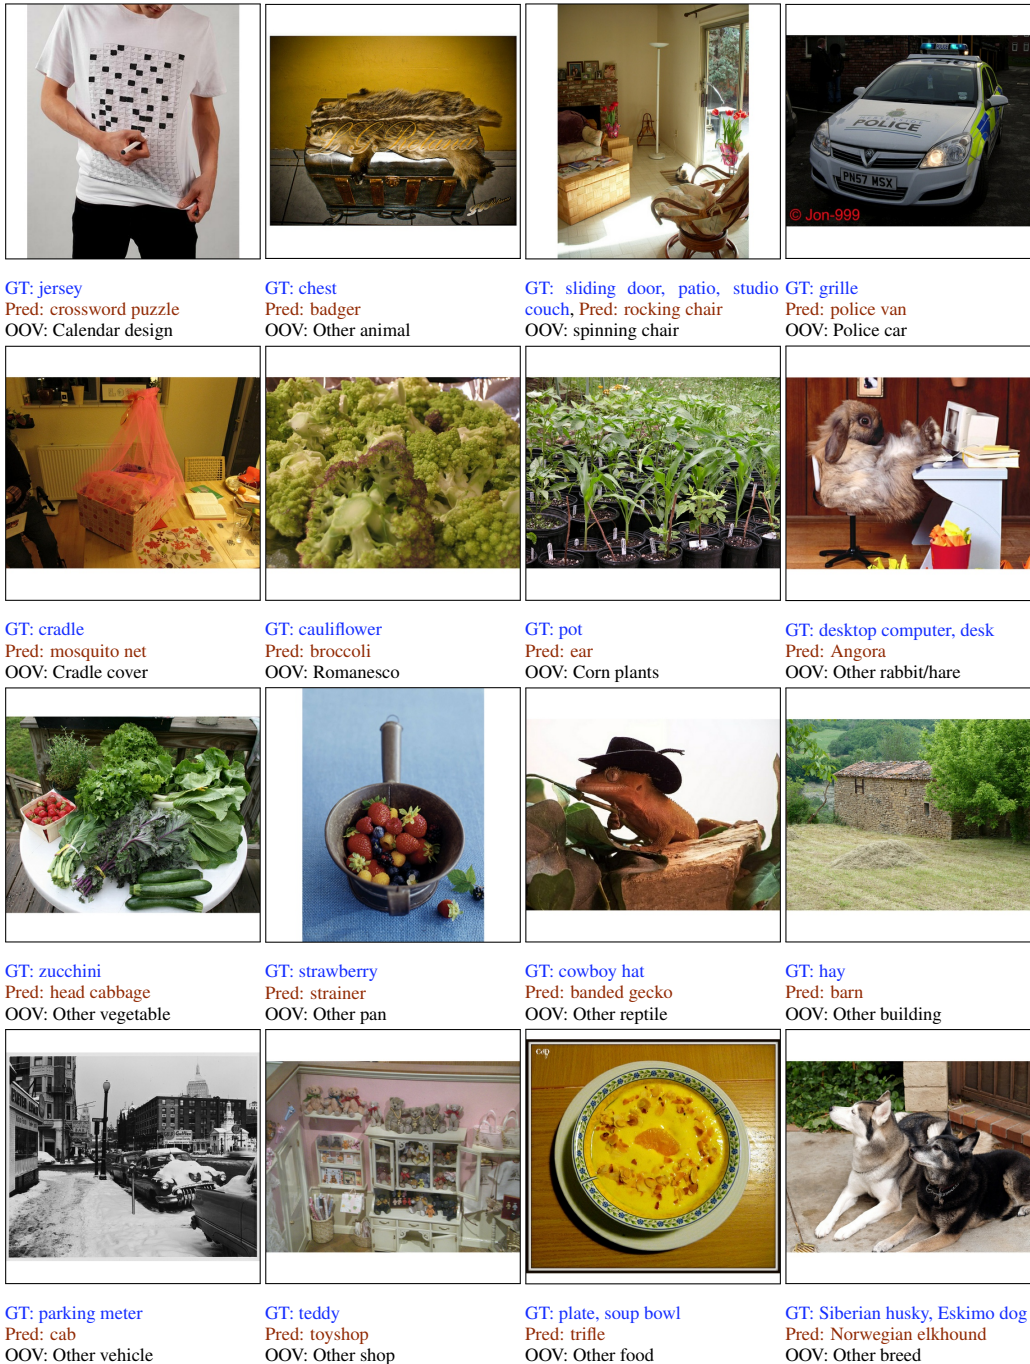

Figure 10: **Fine-grained with OOV mistakes.** Additional examples of fine-grained with out-of-vocabulary mistakes. Of the correct multi-labels, the original ImageNet label is listed first.

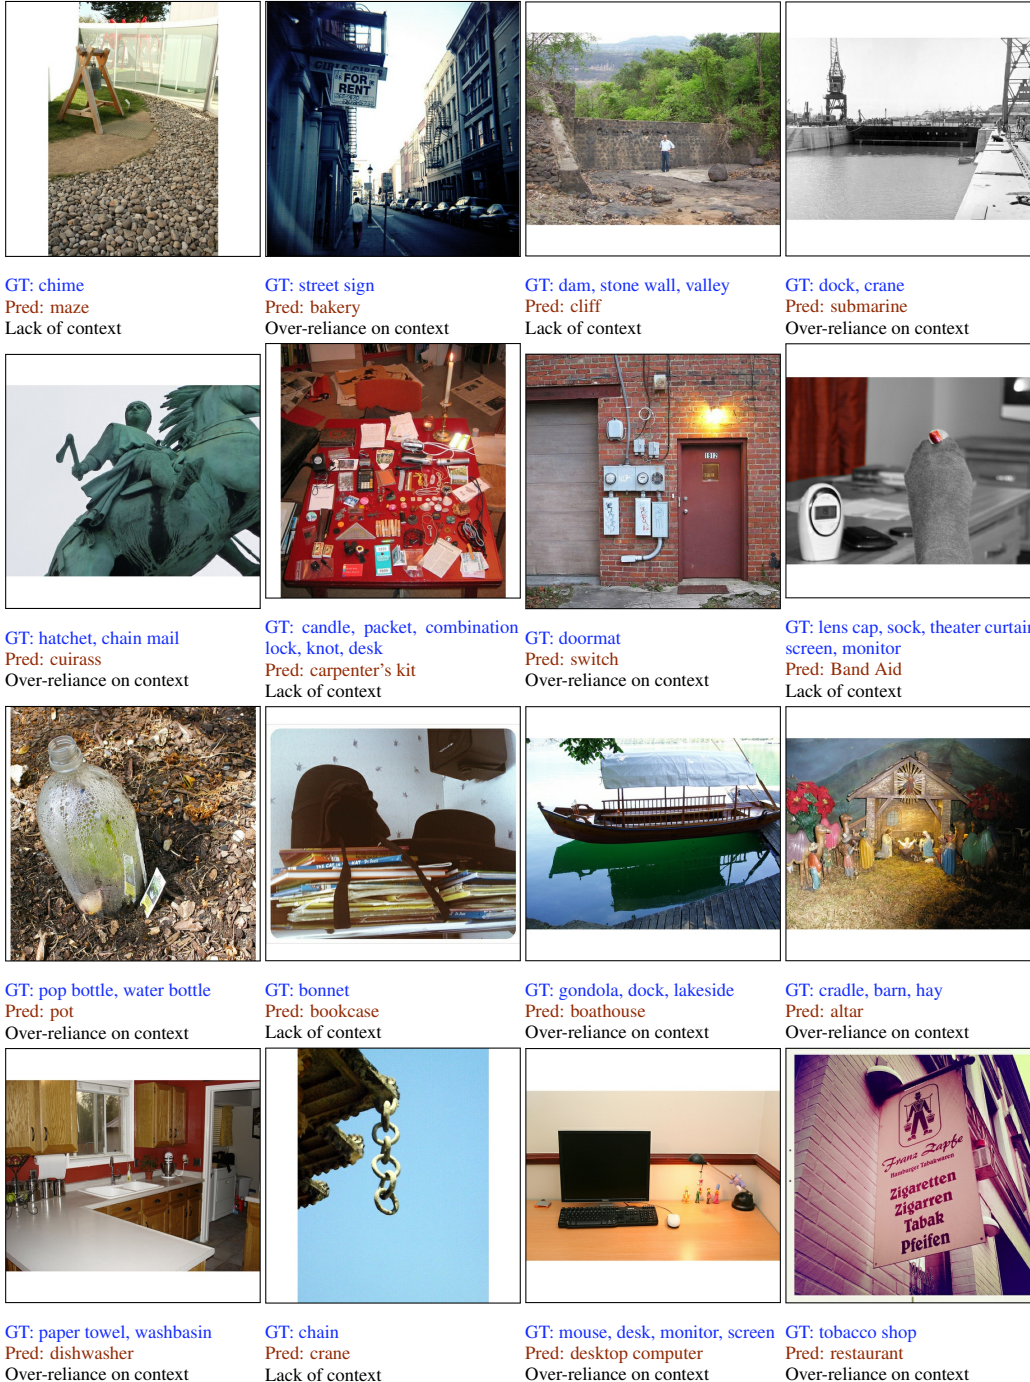

Figure 11: **Spurious correlation examples.** Of the correct multi-labels, the original ImageNet label is listed first. Over-reliance on context indicates that surrounding cues in the image correlate with the predicted class, although the predicted class is not present. Lack of context indicates that the model has failed to understand relevant context in the image, and predicts a class that is inconsistent with a holistic understanding of the image.

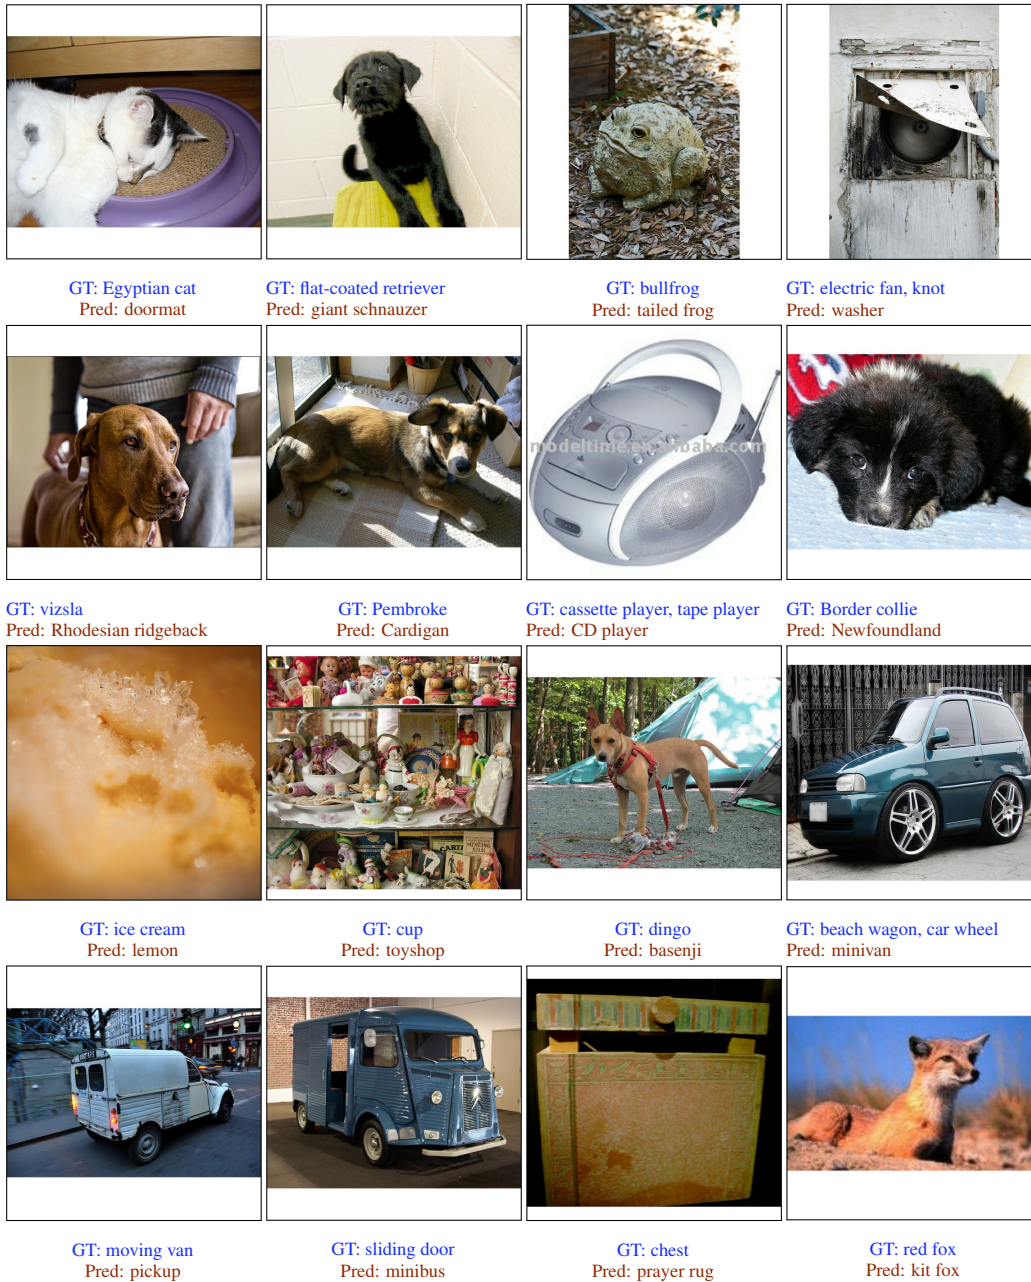

Figure 12: **Non-prototypical mistakes.** Additional examples of non-prototypical mistakes. Of the correct multi-labels, the original ImageNet label is listed first. Non-prototypical examples are typically unusual border cases of the groundtruth class, such as puppies of a dog breed, or unusual/unique versions of the class.

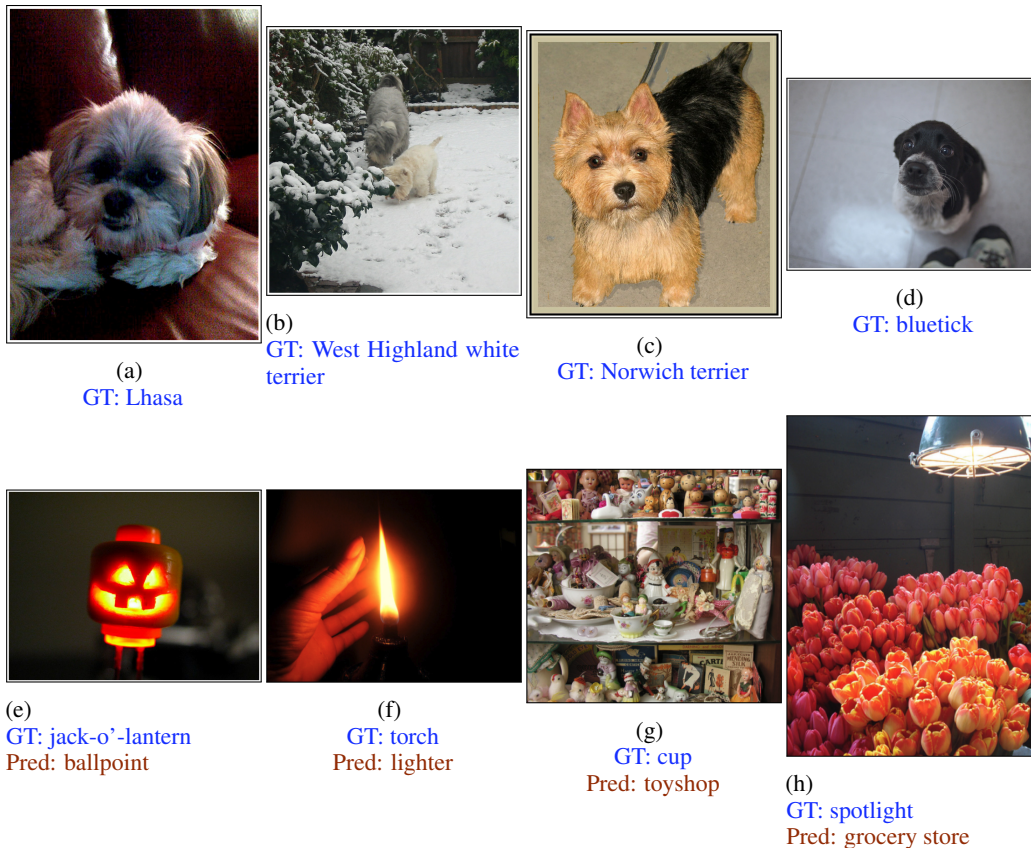

Figure 13: **Difficult images for humans and models.** Top row: the only 4 images that all humans [31] classify incorrectly (our model classifies these correctly). Bottom row: images that should-be-easy (all humans get correct), but the model gets incorrect.

## 609 F Confused classes

610 We provide a list of confused classes and their corresponding frequency of occurrence for the ViT-3B  
611 model on ImageNet validation set. TODO(ALL): Add link to public json file.

## 612 G Analyzing the Training Data

613 In this section, we try to understand the model's remaining mistakes by investigating the training  
614 data. We do this through the lens of looking at the nearest training examples to the ViT-3B models  
615 remaining mistakes. To do this, we generate embeddings for every training and validation example  
616 using the pretrained ViT-3B models JFT checkpoint (before fine-tuning on Imagenet), and for every  
617 error, we query the K=10 nearest neighbors using an exact nearest neighbor lookup.

### 618 G.1 Validation Set Leakage.

619 One of the most interesting findings using nearest neighbors was rediscovering that 797 ImageNet  
620 validation images (1.594%) **exist in the training set as exact duplicates** (pixelwise L2 distance of  
621 0), 34 of them more than once for a total of 831 duplicate training images. While this was previously  
622 documented in [34] and [16], we are the first to notice that every single leaked sample has a different  
623 label in the train set than in the validation set, indicating the ImageNet authors did de-duplicate within  
624 a class, but not across classes. Analyzing these duplicates we find most of them represent challenging  
625 fine grained image classes (e.g. two similar dog breeds), or images where multiple annotations are  
626 appropriate. Additionally, in the Appendix G.2 we detail a second, harder to detect leak pattern we  
627 saw commonly in the training data with "near duplicates", images in the training set that are from the

| Model    | Deduped? | Top1  | Top1 on Leaked | MLA   | MLA on Leaked |
|----------|----------|-------|----------------|-------|---------------|
| ResNet50 | -        | 76.0% | 26.9%          | 84.8% | 80.1%         |
| ResNet50 | ✓        | 76.0% | 40.2%          | 84.6% | 82.1%         |
| ViT-3B   | -        | 89.5% | 42.5%          | 97.8% | 93.4%         |
| ViT-3B   | ✓        | 89.4% | 45.1%          | 97.4% | 94.0%         |

Table 4: **Change in performance when removing leaked training examples.** We show both our ViT-3B and a ResNet50 for comparison, and report both Top1 accuracy and Multi-label Accuracy (MLA) on both the whole validation set and the leaked subset.

628 same photo-shoot or scene as a validation image, or are cropped or processed versions of a validation  
629 image. This phenomenon, with similar discovery methodology, has also been observed on CIFAR [3].

630 To understand the impact of this validation set leakage, we remove all the exact duplicates from  
631 the training set and retrain both a ResNet50 from scratch, and our JFT pretrained ViT-3B. Results  
632 are shown in Table 4. Unintuitively, when we remove all the leaked validation images from the  
633 training set and retrain, we see both Top1 Accuracy and Multi-label Accuracy (MLA) actually stay  
634 the same or decrease overall, despite all leaked training images having different labels than their  
635 leaked validation image counterpart. MLA accuracy both before and after deduplication are high,  
636 which leads us to believe that the training labels may be correct under multi-label evaluation. To  
637 verify this, we find 320 of the leaked validation images were in our 20k multi-label validation set,  
638 corresponding to 331 training images. Using these multi-labels, we find that 219/331 (66.2%) of  
639 these training images labels would have been correct under multi-label evaluation. Nevertheless, we  
640 do see an increase in both Top1 and MLA accuracies on the leaked subset of the data. Finally, it  
641 seems the ViT-3B model is less sensitive to leaked validation images, which may be a function of  
642 the fine tuning recipe we used (which was exactly the same as the fine-tuning recipe on the original  
643 non-deduped data).

## 644 G.2 Near Duplicates

645 In addition to the 831 training examples that are exact duplicates of validation examples (all with  
646 different labels), there is a large collection of "near duplicates" in the Imagenet train set. "Near  
647 duplicates" are images that are either crops, augmentations, or resizes of validation images, or more  
648 unexpectedly, images from the same scene or photo shoot. These images are often visually different  
649 but semantically the same, and as a result are much harder to detect with traditional embedding  
650 distance thresholding based de-duplication. Nevertheless, these can also leak test set information,  
651 introduce label noise (if the labels are different than the validation set), or if many training examples  
652 are from the same scene, reduce the effective dataset size of that class.

653 While we cannot provide an estimate of the prevalence of this problem, we find it often while  
654 analyzing the K-Nearest Neighbors (in JFT embedding space) of validation images. We show some of  
655 these examples in Figures 14 and 15. While we just show dog and object examples here, we find this  
656 also happens with reasonable frequency for human related classes (especially activity related classes  
657 like soccer, basketball, parallel bars, etc). The existence of these duplicates raises an interesting  
658 question: How close can training examples be to your validation set before it becomes problematic?

## 659 G.3 Neighbors of Spurious Correlations

660 While fine grained errors and OOV mistakes are often somewhat intuitive to a human, spurious  
661 correlations are harder to understand. To try to understand them in more detail, we look at the  
662 neighbors of several of the ViT-3B models major spurious correlations. In Figure 16 we show two  
663 such examples, but find this to be relatively common.

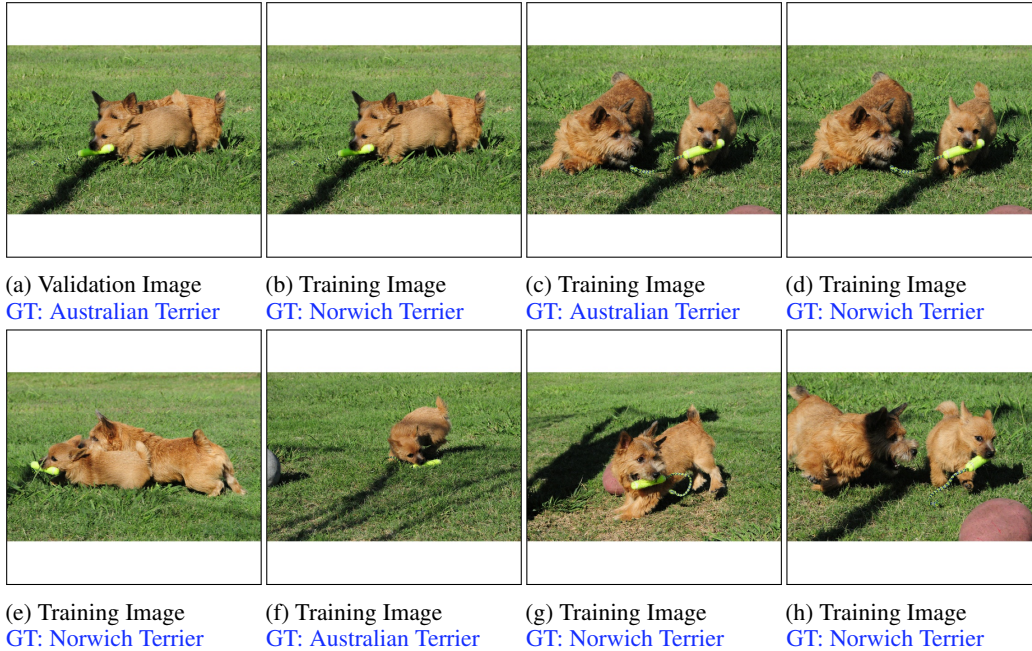

Figure 14: **Near Duplicates:** (a) We show a validation image of two dogs playing, labeled originally as an Australian Terrier. When looking at the  $K = 10$  nearest neighbors, we find all 10 of them to be of the same two dogs with one of two labels, shown as images (b) through (h), including some training examples that are duplicates of each other. Because we only retrieve the 10 nearest neighbors, there could be even more than 10 images of this scene.

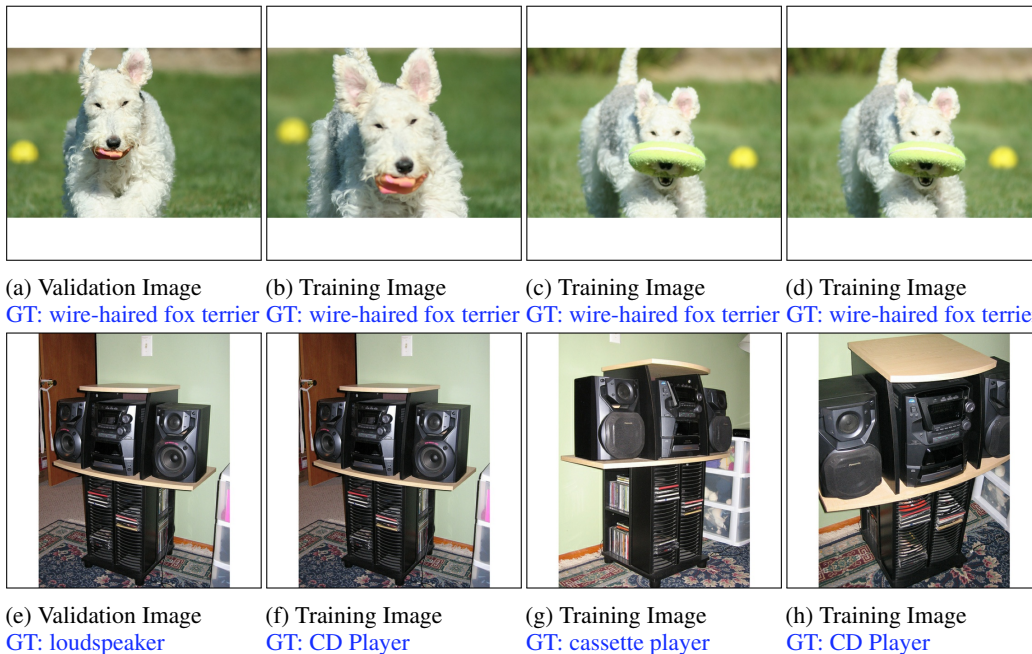

Figure 15: **Near Duplicates:** Top: (a) We show a wire-haired fox terrier with a cropped version of the validation image as a training image, and two more training images that are cropped versions of each other. We find 6/10 of the nearest neighbors are of the same dog. Bottom: We show a "loudspeaker" in the validation set with nearby images from the training set of the same speaker setup with labels of "CD Player" and "cassette player". We find 8/10 of its nearest neighbors are the same speaker setup, with several of the training images being exact duplicates of each other (or the validation set) with different labels.

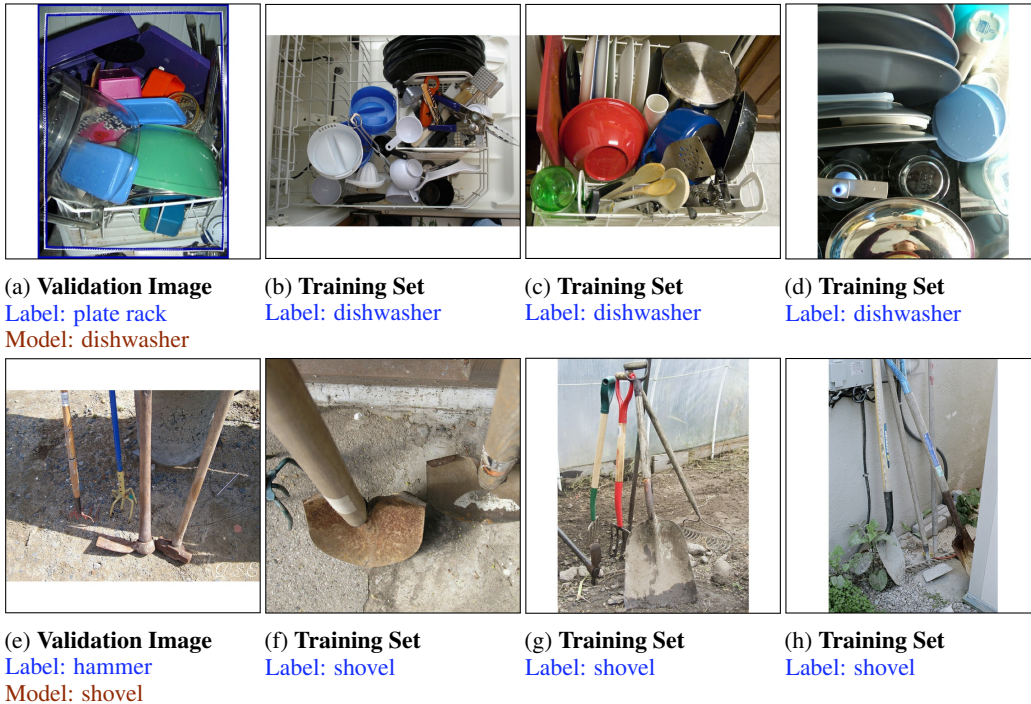

**Figure 16: Neighbors of a Major Spurious Correlation.** We show an example of two major spurious correlations and a subset of their  $K=10$  nearest neighbors (in JFT embedding space). For the dishwasher example (top), 8/10 of the nearest neighbors were pictures of cluttered dishes where the dishwasher machine was not in view. For the shovel example, we find all 10 nearest neighbors are shovels standing upright and outdoors. There are no other validation images of the hammer class with it standing upright or even outdoors.
